# Supplementary material for: Current Knowledge on Spinal Meningiomas Epidemiology, Tumor Characteristics and Non-Surgical Treatment Options: A Systematic Review and Pooled Analysis (Part 1)
Source: MDPI journal article supplement (doi:10.3390/cancers14246251), 2022-12-19
Supplement: s1 [file s1]

| Database       | Queries                                                                                                                                                                                                                                                                                                                                                                                                                                                                                                                                                                                                                            |
|----------------|------------------------------------------------------------------------------------------------------------------------------------------------------------------------------------------------------------------------------------------------------------------------------------------------------------------------------------------------------------------------------------------------------------------------------------------------------------------------------------------------------------------------------------------------------------------------------------------------------------------------------------|
| PubMed         | ((("spinal meningioma*" [Title] NOT "case report" [All Fields]) AND 2000/01/01:3000/12/31 [Date - Publication] AND "english" [Language] AND ("loattrfull text" [Filter] AND "humans" [MeSH Terms] AND "english" [Language])) OR (((("spin*" [All Fields] AND ("meningioma" [MeSH Terms] OR "meningioma" [All Fields] OR "meningiomas" [All Fields])) NOT ("case reports" [Publication Type] OR "case report" [All Fields])) AND 2000/01/01:3000/12/31 [Date - Publication] AND ("loattrfull text" [Filter] AND "humans" [MeSH Terms] AND "english" [Language]))) AND ((fft [Filter]) AND (humans [Filter]) AND (english [Filter])) |
| Web of Science | ((ALL=("spinal meningioma") AND PY=(2000-2500) AND LA=(English) NOT TS=("CASE REPORT")) NOT (TASCA=("VETERINARY SCIENCES") OR DT=("EDITORIAL MATERIAL" OR "LETTER" OR "MEETING ABSTRACT")) OR ((TI=(spinal AND meningioma*) AND PY=(2000-2500) AND LA=(English) NOT TI=(case report)) NOT (TASCA=("VETERINARY SCIENCES") OR DT=("EDITORIAL MATERIAL" OR "LETTER" OR "MEETING ABSTRACT"))                                                                                                                                                                                                                                           |
| Embase         | spinal meningioma*':ab,ti NOT 'case report' AND [2000-2021]/py NOT ('spinal meningioma*':ab,ti NOT 'case report' AND [2000-2021]/py) AND ('animal experiment'/de OR 'animal model'/de OR 'animal tissue'/de OR 'nonhuman'/de)                                                                                                                                                                                                                                                                                                                                                                                                      |
